# Supplementary material for: A Dy2 single-molecule magnet with benzoate anions and phenol-O− bridging groups
Source: Royal Society of Chemistry journal article supplement (doi:10.1039/c5dt03607k), 2015-01-01
Supplement: c5dt03607k1.pdf [file c5dt03607k1.pdf]

## **A Dy<sub>2</sub> Single-Molecule Magnet with the benzoate anions and phenol-O<sup>-</sup> bridging groups**

Hongshan Ke,<sup>‡a</sup> Sheng Zhang,<sup>‡a</sup> Xin Li,<sup>a</sup> Qing Wei,<sup>a</sup> Gang Xie,<sup>a</sup> Wenyuan wang,<sup>a</sup> Sanping Chen<sup>\*a</sup>

<sup>a</sup> *Key Laboratory of Synthetic and Natural Functional Molecule Chemistry of Ministry of Education, College of Chemistry and Materials Science, Northwest University, Xi'an, Shaanxi 710069, PR China*

<sup>‡</sup> These authors have equal contribution to this work.

**Corresponding authors**

**Dr. Sanping Chen**

**E-mail address: sanpingchen@126.com**

**Table S1.** Crystal data and structure refinement details for the compound **1**.

| Compound                                           | <b>1</b>                                                                       |
|----------------------------------------------------|--------------------------------------------------------------------------------|
| Empirical formula                                  | C <sub>62</sub> H <sub>62</sub> Dy <sub>2</sub> N <sub>8</sub> O <sub>22</sub> |
| Formula weight                                     | 1596.20                                                                        |
| Temperature                                        | 296(2) K                                                                       |
| Crystal system                                     | Monoclinic                                                                     |
| space group                                        | <i>P</i> 2 <sub>1</sub> / <i>c</i>                                             |
| <i>a</i> (Å)                                       | 13.432(2)                                                                      |
| <i>b</i> (Å)                                       | 10.503(2)                                                                      |
| <i>c</i> (Å)                                       | 24.428(4)                                                                      |
| $\alpha$ (°)                                       | 90                                                                             |
| $\beta$ (°)                                        | 98.478(4)                                                                      |
| $\gamma$ (°)                                       | 90                                                                             |
| <i>V</i> (Å <sup>3</sup> )                         | 3408.9(11)                                                                     |
| <i>Z</i>                                           | 2                                                                              |
| F(000)                                             | 1596                                                                           |
| Goodness-of-fit on F <sup>2</sup>                  | 1.577                                                                          |
| Final <i>R</i> indices [ <i>I</i> >2σ( <i>I</i> )] | <i>R</i> <sub>1</sub> = 0.1549<br><i>wR</i> <sub>2</sub> = 0.2116              |
| <i>R</i> indices (all data)                        | <i>R</i> <sub>1</sub> = 0.1904<br><i>wR</i> <sub>2</sub> = 0.2222              |
| CCDC                                               | 1421395                                                                        |

**Table S2.** Selected bond lengths (Å) and angles (°) for **1**.

| Compound <b>1</b> |           |                     |          |
|-------------------|-----------|---------------------|----------|
| Dy(1)-O(8)#1      | 2.322(12) | O(3)-Dy(1)-O(2)     | 74.4(4)  |
| Dy(1)-O(4)        | 2.341(12) | O(7)-Dy(1)-O(2)     | 71.5(4)  |
| Dy(1)-O(3)        | 2.349(12) | O(4)#1-Dy(1)-O(2)   | 99.1(4)  |
| Dy(1)-O(7)        | 2.401(14) | O(8)#1-Dy(1)-O(6)#1 | 73.8(5)  |
| Dy(1)-O(4)#1      | 2.421(11) | O(4)-Dy(1)-O(6)#1   | 133.8(4) |
| Dy(1)-O(2)        | 2.439(12) | O(3)-Dy(1)-O(6)#1   | 71.6(4)  |
| Dy(1)-O(6)#1      | 2.502(14) | O(7)-Dy(1)-O(6)#1   | 114.4(5) |
| Dy(1)-O(1)        | 2.503(12) | O(4)#1-Dy(1)-O(6)#1 | 63.5(4)  |
| Dy(1)-N(1)        | 2.563(15) | O(2)-Dy(1)-O(6)#1   | 71.3(5)  |
| O(4)-Dy(1)#1      | 2.421(11) | O(8)#1-Dy(1)-O(1)   | 139.9(4) |
| O(6)-Dy(1)#1      | 2.502(14) | O(4)-Dy(1)-O(1)     | 105.4(4) |
| O(8)-Dy(1)#1      | 2.322(12) | O(3)-Dy(1)-O(1)     | 74.0(4)  |
| N(5)-C(34)        | 1.276(19) | O(7)-Dy(1)-O(1)     | 69.8(4)  |
| O(8)#1-Dy(1)-O(4) | 76.3(4)   | O(4)#1-Dy(1)-O(1)   | 137.9(4) |
| O(8)#1-Dy(1)-O(3) | 76.5(4)   | O(2)-Dy(1)-O(1)     | 53.0(4)  |
| O(4)-Dy(1)-O(3)   | 133.0(4)  | O(6)#1-Dy(1)-O(1)   | 120.2(4) |
| O(8)#1-Dy(1)-O(7) | 143.0(4)  | O(8)#1-Dy(1)-N(1)   | 73.5(4)  |

|                                                                                |          |                   |          |
|--------------------------------------------------------------------------------|----------|-------------------|----------|
| O(4)-Dy(1)-O(7)                                                                | 73.1(4)  | O(4)-Dy(1)-N(1)   | 70.8(4)  |
| O(3)-Dy(1)-O(7)                                                                | 140.5(4) | O(3)-Dy(1)-N(1)   | 65.0(4)  |
| O(8)#1-Dy(1)-O(4)#1                                                            | 82.2(4)  | O(7)-Dy(1)-N(1)   | 114.4(5) |
| O(4)-Dy(1)-O(4)#1                                                              | 78.2(4)  | O(4)#1-Dy(1)-N(1) | 144.2(4) |
| O(3)-Dy(1)-O(4)#1                                                              | 134.0(4) | O(2)-Dy(1)-N(1)   | 116.5(4) |
| O(7)-Dy(1)-O(4)#1                                                              | 71.6(4)  | O(6)#1-Dy(1)-N(1) | 130.2(5) |
| O(8)#1-Dy(1)-O(2)                                                              | 139.9(4) | O(1)-Dy(1)-N(1)   | 69.7(4)  |
| O(4)-Dy(1)-O(2)                                                                | 143.4(4) |                   |          |
| Symmetry transformations used to generate equivalent atoms:<br>#1 -x,-y+1,-z+1 |          |                   |          |

**Table S3.** Dy<sup>III</sup> ion geometry analysis by SHAPE 2.1 software.

| PtL4 structures |                    |                                    |        |        |          |         |          |         |
|-----------------|--------------------|------------------------------------|--------|--------|----------|---------|----------|---------|
| JTC-9           | 4 C <sub>3v</sub>  | Johnson triangular cupola J3       |        |        |          |         |          |         |
| JCCU-9          | 5 C <sub>4v</sub>  | Capped cube J8                     |        |        |          |         |          |         |
| CCU-9           | 6 C <sub>4v</sub>  | Spherical-relaxed capped cube      |        |        |          |         |          |         |
| JCSAPR-9        | 7 C <sub>4v</sub>  | Capped square antiprism J10        |        |        |          |         |          |         |
| CSAPR-9         | 8 C <sub>4v</sub>  | Spherical Capped square antiprism  |        |        |          |         |          |         |
| JTCTPR-9        | 9 D <sub>3h</sub>  | Tricapped trigonal prism J51       |        |        |          |         |          |         |
| TCTPR-9         | 10 D <sub>3h</sub> | Spherical tricapped trigonal prism |        |        |          |         |          |         |
| Structure [ML9] |                    | JTC-9                              | JCCU-9 | CCU-9  | JCSAPR-9 | CSAPR-9 | JTCTPR-9 | TCTPR-9 |
| ABOXIY          | ,                  | 16.102,                            | 9.664, | 8.554, | 2.169,   | 1.408,  | 3.318,   | 1.579   |

|                                                 |        |
|-------------------------------------------------|--------|
| Configuration                                   | ABOXIY |
| Johnson triangular cupola ( $C_{3v}$ )          | 16.102 |
| Capped cube ( $C_{4v}$ )                        | 9.664  |
| Spherical-relaxed capped cube ( $C_{4v}$ )      | 8.554  |
| Capped square antiprism ( $C_{4v}$ )            | 2.169  |
| Spherical capped square antiprism ( $C_{4v}$ )  | 1.408  |
| Tricapped trigonal prism ( $D_{3h}$ )           | 3.318  |
| Spherical tricapped trigonal prism ( $D_{3h}$ ) | 1.579  |

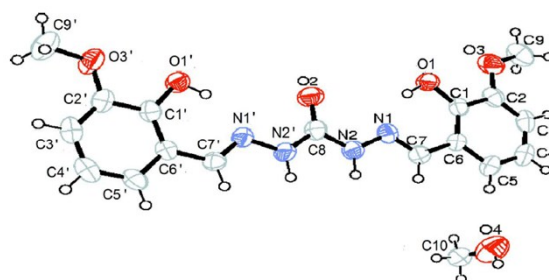

**Scheme S1.** An *ORTEP* view of the title compound, showing the atom-numbering scheme. Displacement ellipsoids are plotted at the 50% probability level. Only one position of the disordered solvent methanol molecule is shown for clarity. (Copied from the Ref. M. M. Sow, Ou. Diouf, M. Seck, A. H. Barry, M. Gaye. *Acta Cryst.* (2014). E70, o423.)

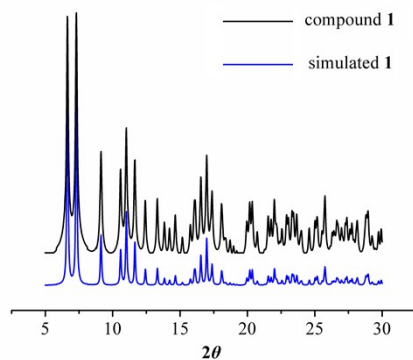

**Figure S1.** XRPD curve of **1**.

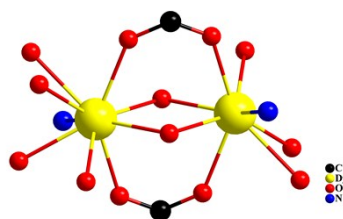

**Figure S2.** The  $Dy_2$  unit bridged by two oxygen atoms with  $\mu_1:\eta^2$  coordination mode and the two carboxylic groups in the form of  $\mu_2:\eta^1,\eta^2$ .

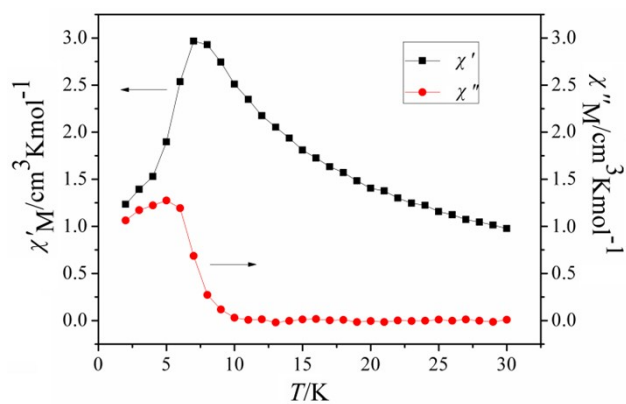

**Figure S3.** Temperature dependences of  $\chi'_M$  (top) and  $\chi''_M$  (bottom) of **1** measured at 1000 Hz without external applied dc field.

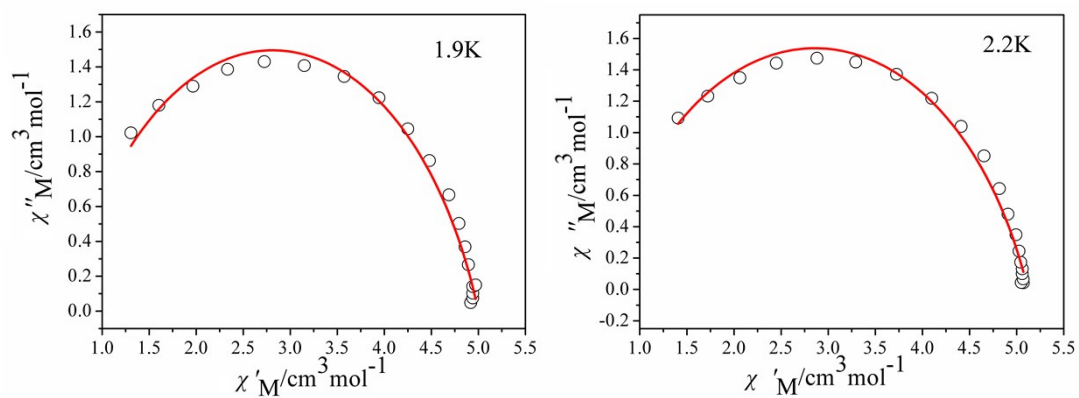

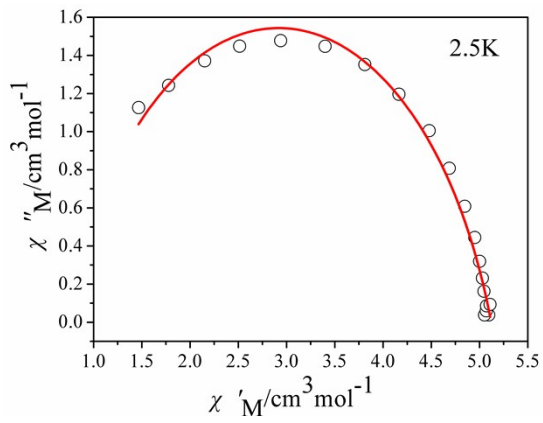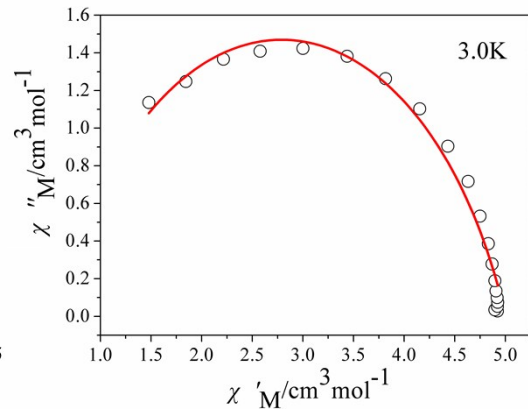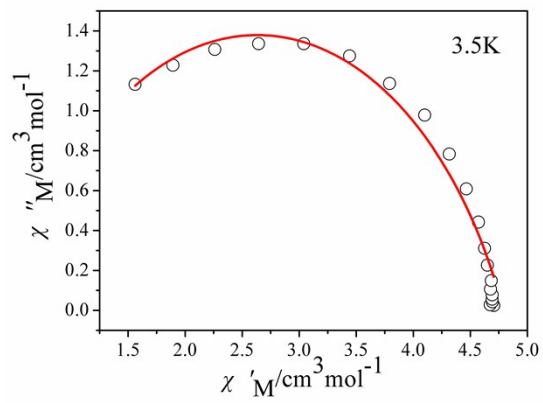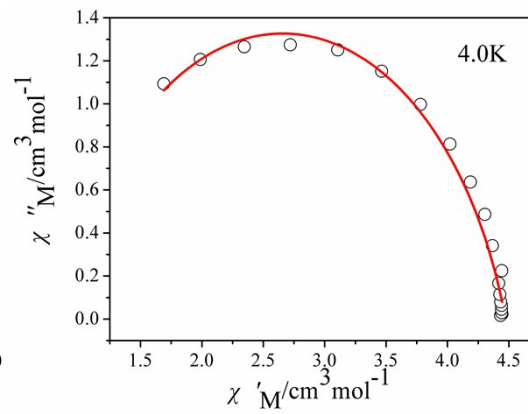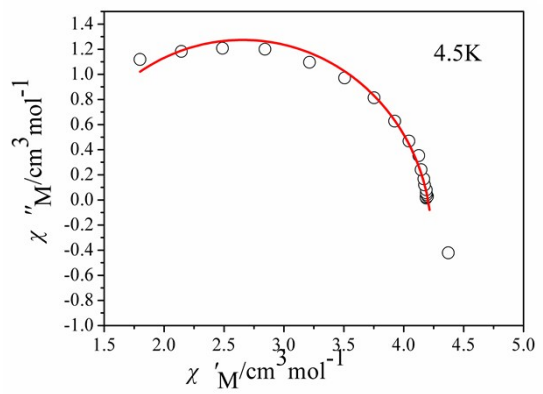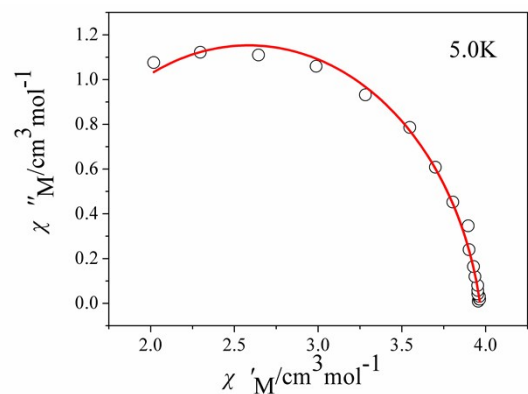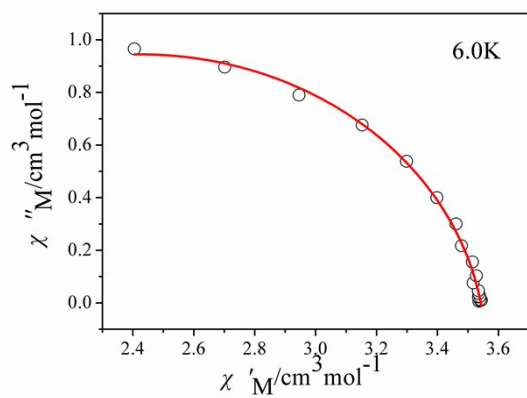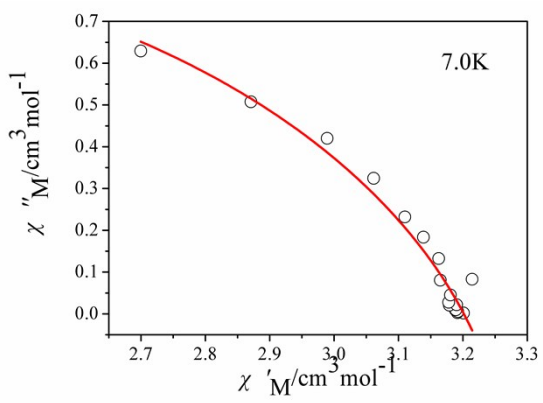

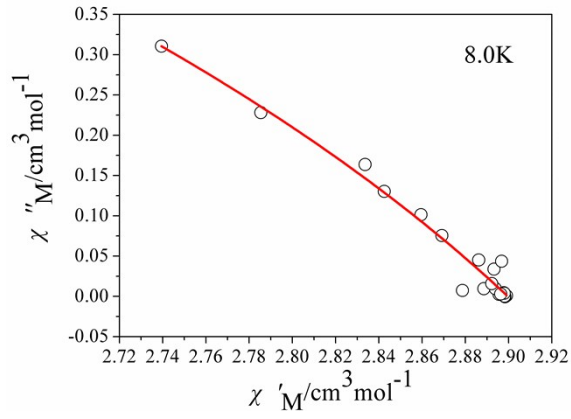

**Figure S4.** Simulations of dynamical susceptibility  $\chi(\omega)$  ranging from 1.9 to 8.0 K in a Cole-Cole diagram. Red lines were performed using the sum of two modified Debye functions with the fitting parameters in Table S3.

**Table S4.** Relaxation fitting parameters from Least-Squares Fitting of  $\chi(\omega)$  data.

| $T(K)$ | $\Delta\chi_1$<br>( $\text{cm}^3\text{mol}^{-1}$ ) | $\Delta\chi_2$<br>( $\text{cm}^3\text{mol}^{-1}$ ) | $\alpha_1$ |
|--------|----------------------------------------------------|----------------------------------------------------|------------|
| 1.9    | 4.998                                              | 0.628                                              | 0.236      |
| 2.2    | 5.119                                              | 0.600                                              | 0.239      |
| 2.5    | 5.120                                              | 0.710                                              | 0.220      |
| 3.0    | 5.000                                              | 0.578                                              | 0.253      |
| 3.5    | 4.790                                              | 0.470                                              | 0.277      |
| 4.0    | 4.470                                              | 0.840                                              | 0.196      |
| 4.5    | 4.202                                              | 1.108                                              | 0.123      |
| 5.0    | 3.960                                              | 1.203                                              | 0.117      |
| 6.0    | 3.540                                              | 1.306                                              | 0.107      |
| 7.0    | 3.201                                              | 0.782                                              | 0.209      |
| 8.0    | 2.900                                              | 0.834                                              | 0.240      |
